# Supplementary material for: Musical training shapes neural responses to melodic and prosodic expectation
Source: PubMed Central journal article supplement (PMC5069926; doi:10.1016/j.brainres.2016.09.015), 2016-11-01
Supplement: mmc2.pdf [file mmc2.pdf]

Melodies: 1 - 10

# Melodic stimuli

The image displays ten musical staves, each containing a short melodic sequence. The notes are quarter notes, and the sequences are as follows:

- Staff 1: C4, D4, E4, F#4, G4
- Staff 2: C4, D4, E4, F4, G4
- Staff 3: C#4, D#4, E4, F4, G4
- Staff 4: C#4, D4, E4, F4, G4
- Staff 5: C4, D4, E4, F4, G4
- Staff 6: C#4, D4, E4, F4, G4
- Staff 7: C4, D4, E4, F4, G4
- Staff 8: C#4, D4, E4, F4, G4
- Staff 9: C4, D4, E4, F4, G4
- Staff 10: C4, D4, E4, F4, G4

Melodies: 11 - 20

This image displays ten musical staves, each containing a single melodic line. The staves are arranged vertically and are all in treble clef. The first staff uses a C-clef (soprano clef), while the remaining nine staves use a G-clef (treble clef). The notes are primarily quarter notes and half notes, with some staves featuring accidentals such as flats and sharps. Each staff concludes with a double bar line and repeat dots.

- Staff 1: C-clef, notes: C4, D4, E4, F4, G4, A4.
- Staff 2: G-clef, notes: C4, D4, E4, F4, G4.
- Staff 3: G-clef, notes: C4, D4, E4, F4, G4.
- Staff 4: G-clef, notes: C4, D4, E4, F4, G4.
- Staff 5: G-clef, key signature: one flat (Bb), notes: C4, D4, E4, F4, G4.
- Staff 6: G-clef, key signature: one flat (Bb), notes: C4, D4, E4, F4, G4.
- Staff 7: G-clef, key signature: one flat (Bb), notes: C4, D4, E4, F4, G4.
- Staff 8: G-clef, notes: C4, D4, E4, F4, G4.
- Staff 9: G-clef, notes: C4, D4, E4, F4, G4.
- Staff 10: G-clef, notes: C4, D4, E4, F4, G4.

Melodies: 21 - 30

The image displays ten musical staves, each containing a single melodic line. The notes are primarily quarter notes, with some half notes and accidentals (sharps and flats). The staves are arranged vertically, and each staff concludes with a double bar line. The notes are as follows:

- Staff 1: G4, A4, B4, C#5, D5
- Staff 2: F4, G4, A4, B4, C5
- Staff 3: G4, A4, Bb4, C5, D5
- Staff 4: G4, A4, B4, C5, D5
- Staff 5: G4, A4, B4, C5, D5
- Staff 6: G4, A4, B4, Cb5, D5
- Staff 7: G4, Ab4, B4, C5, D5
- Staff 8: G4, A4, B4, C5, D5
- Staff 9: G4, A4, B4, C5, D5
- Staff 10: G4, A4, B4, C5, D5

Melodies: 31 - 40

The image displays ten musical staves, each containing a single melodic line. The notation is as follows:

- Staff 1: Treble clef, key signature of one flat (Bb). Notes: Bb, C, D, E, F. Final note: G.
- Staff 2: Treble clef. Notes: C, D, E, F, G. Final note: A.
- Staff 3: Treble clef. Notes: C, D, E, F, G. Final note: A.
- Staff 4: Treble clef. Notes: C, D, E, F, G. Final note: A.
- Staff 5: Treble clef. Notes: C, D, E, F# (sharped), G. Final note: A.
- Staff 6: Treble clef. Notes: C, D, E, F# (sharped), G. Final note: A.
- Staff 7: Treble clef. Notes: C, D, E, F, G. Final note: A.
- Staff 8: Treble clef. Notes: C, D, E, F, G. Final note: A.
- Staff 9: Treble clef. Notes: C, D, E, F, G. Final note: A.
- Staff 10: Treble clef. Notes: C, D, E, F, G. Final note: A.

Melodies: 41 - 50

This image displays ten musical staves, each containing a single melodic line. The staves are arranged vertically and are all in treble clef. The notes are as follows:

- Staff 1: G4, A4, Bb4, C5, D5, E5 (half note).
- Staff 2: G4, A4, B4, C5, D5, E5 (half note).
- Staff 3: G4, A4, B4, C5, D5, E5 (half note).
- Staff 4: G4, A4, B4, C5, D5, E5 (half note).
- Staff 5: G4, A#4, B4, C5, D5, E5 (half note).
- Staff 6: G4, A4, B4, C5, D5, E5 (half note).
- Staff 7: G4, Ab4, B4, C5, D5, E5 (half note).
- Staff 8: G4, Ab4, B4, C5, D5, E5 (half note).
- Staff 9: G4, A4, B4, C5, D5, E5 (half note).
- Staff 10: G4, A4, B4, C5, D5, E5 (half note).

Melodies: 51 - 60

This image displays ten musical staves, each containing a five-measure melodic exercise. The exercises are as follows:

- Staff 1: A sequence of five quarter notes: G4, A4, B4, C5, B4.
- Staff 2: A sequence of five quarter notes: G4, A4, B4, C5, B4.
- Staff 3: A sequence of five quarter notes: F4, G4, A4, B4, C5. A flat symbol (b) is placed above the first note (F4).
- Staff 4: A sequence of five quarter notes: G4, A4, B4, C5, B4.
- Staff 5: A sequence of five quarter notes: G4, A4, B4, C5, B4.
- Staff 6: A sequence of five quarter notes: G4, A4, B4, C5, B4.
- Staff 7: A sequence of five quarter notes: G4, A4, B4, C5, B4.
- Staff 8: A sequence of five quarter notes: G4, A4, B4, C5, B4.
- Staff 9: A sequence of five quarter notes: G4, A4, B4, C5, B4.
- Staff 10: A sequence of five quarter notes: G4, A4, B4, C5, B4.

Melodies: 61 - 70

The image displays ten musical staves, each containing a sequence of notes. The notes are primarily quarter notes and half notes, with some staves featuring a final half note with a fermata. The patterns are as follows:

- Staff 1: A sequence of four quarter notes (G4, A4, B4, C5) followed by a half note (B4) with a fermata.
- Staff 2: A sequence of four quarter notes (F4, G4, A4, B4) followed by a half note (A4) with a fermata.
- Staff 3: A sequence of four quarter notes (G4, A4, B4, C5) followed by a half note (B4) with a fermata.
- Staff 4: A sequence of four quarter notes (G4, A4, B4, C5) followed by a half note (B4) with a fermata.
- Staff 5: A sequence of four quarter notes (G4, A4, B4, C5) followed by a half note (B4) with a fermata.
- Staff 6: A sequence of four quarter notes (G4, A4, B4, C5) followed by a half note (B4) with a fermata.
- Staff 7: A sequence of four quarter notes (G4, A4, B4, C5) followed by a half note (B4) with a fermata.
- Staff 8: A sequence of four quarter notes (G4, A4, B4, C5) followed by a half note (B4) with a fermata.
- Staff 9: A sequence of four quarter notes (G4, A4, B4, C5) followed by a half note (B4) with a fermata.
- Staff 10: A sequence of four quarter notes (G4, A4, B4, C5) followed by a half note (B4) with a fermata.

Melodies: 71 - 80

The image displays ten musical staves, each containing a short melodic exercise. The exercises are written in treble clef and consist of a sequence of notes followed by a final chord. The notes are primarily quarter notes, with some exercises featuring eighth notes or a final half note. The exercises are as follows:

- Staff 1: G4, A4, B4, C5, D5 (quarter notes), E5 (half note).
- Staff 2: G4, A4, B4, C5, D5 (quarter notes), E5 (half note).
- Staff 3: G4, A4, B4, C5, D5 (quarter notes), E5 (half note).
- Staff 4: G4, A4, B4, C5, D5 (quarter notes), E5 (half note).
- Staff 5: G4, A4, B4, C5, D5 (quarter notes), E5 (half note).
- Staff 6: G4, A4, B4, C5, D5 (quarter notes), E5 (half note).
- Staff 7: G4, A4, B4, C5, D5 (quarter notes), E5 (half note).
- Staff 8: G4, A4, B4, C5, D5 (quarter notes), E5 (half note).
- Staff 9: G4, A4, B4, C5, D5 (quarter notes), E5 (half note).
- Staff 10: G4, A4, B4, C5, D5 (quarter notes), E5 (half note).



Melodies: 81 - 90

This image displays ten musical staves, each containing a single melodic line. The staves are arranged vertically and are all in treble clef. The notes are primarily quarter notes, with some staves featuring a sharp sign (#) on a note. The staves are numbered 81 through 90, corresponding to the section header. The notes are as follows:

- Staff 81: G4, A4, B4, C5, D5 (half note)
- Staff 82: G4, A4, B4, C5, D5 (half note)
- Staff 83: G4, A4, B4, C5, D5 (half note)
- Staff 84: G4, A4, B4, C5, D5 (half note)
- Staff 85: G4, A4, B4, C5, D5 (half note)
- Staff 86: G4, A4, B4, C5, D5 (half note)
- Staff 87: G4, A4, B4, C5, D5 (half note)
- Staff 88: G4, A4, B4, C5, D5 (half note)
- Staff 89: G4, A4, B4, C5, D5 (half note)
- Staff 90: G4, A4, B4, C5, D5 (half note)

Melodies: 91 - 100

This image displays ten musical staves, each containing a five-measure melodic exercise. The exercises are as follows:

- Staff 1: A sequence of five quarter notes: G4, A4, B4, A4, G4.
- Staff 2: A sequence of five quarter notes: G4, F4 (with a flat), E4, D4 (with a flat), C4.
- Staff 3: A sequence of five quarter notes: G4, A4, B4, C5, B4.
- Staff 4: A sequence of five quarter notes: G4, A4, B4, C5, B4.
- Staff 5: A sequence of five quarter notes: G4, A4, B4, C5, B4.
- Staff 6: A sequence of five quarter notes: G4, A4, B4, C5, B4.
- Staff 7: A sequence of five quarter notes: G4, A4, B4, C5, B4.
- Staff 8: A sequence of five quarter notes: G4, A4 (with a sharp), B4, C5, B4.
- Staff 9: A sequence of five quarter notes: G4, A4, B4, C5, B4.
- Staff 10: A sequence of five quarter notes: G4, A4 (with a sharp), B4, C5, B4.
