# Supplementary material for: Musical training shapes neural responses to melodic and prosodic expectation
Source: PubMed Central journal article supplement (PMC5069926; doi:10.1016/j.brainres.2016.09.015), 2016-11-01
Supplement: mmc3.pdf [file mmc3.pdf]

Melodies: 1 - 10

The image displays ten musical staves, each containing a single melodic line. The notes are quarter notes, and the staves are organized into two groups of five. The first group (staves 1-5) uses a key signature of one sharp (F#), while the second group (staves 6-10) uses a key signature of one flat (Bb). Each staff concludes with a double bar line. The notes and accidentals for each staff are as follows:

- Staff 1: C4, D4, E4, F#4, G4
- Staff 2: G4, A4, B4, C5, D5
- Staff 3: F#4, G#4, A4, B4, C5
- Staff 4: F#4, G4, A4, B4, C5
- Staff 5: G4, A4, B4, C5, D5
- Staff 6: F#4, G4, A4, B4, C5
- Staff 7: F#4, G4, A4, B4, C5
- Staff 8: F#4, G4, A4, B4, C5
- Staff 9: Bb4, Cb5, D5, Eb5, F5
- Staff 10: Bb4, Cb5, D5, Eb5, F5

Melodies: 11 - 20

The image displays ten musical staves, each containing a single melodic line. The notes are quarter notes, and the staves are organized into two groups of five. The first group (staves 1-5) uses a treble clef and a key signature of one sharp (F#). The second group (staves 6-10) uses a treble clef and a key signature of one flat (Bb). Each staff concludes with a double bar line. The notes and accidentals for each staff are as follows:

- Staff 1: C4, D4, E4, F#4, G#4
- Staff 2: C4, D4, E4b, F4, G4
- Staff 3: C4, D4, E4b, F4, G4
- Staff 4: C4, D4, E#4, F4, G4
- Staff 5: C4, D4, E4, F4, G4
- Staff 6: C4, D4, E4, F4, G4
- Staff 7: C4, D4, E4, F4, G4
- Staff 8: C4, D4, E4, F4, G4
- Staff 9: C4, D4, E4, F4, G4
- Staff 10: C4, D4, E4, F4, G4

Melodies: 21 - 30

The image displays ten musical staves, each containing a single melodic line. The staves are arranged vertically and are all in treble clef. The notes are quarter notes, and the accidentals are sharps (#) and flats (b). The staves are numbered 21 through 30. Staff 21: G4, A4, B4, C#5, D#5. Staff 22: Bb4, C5, D5, E5, F#5. Staff 23: G4, A4, Bb4, C5, D#5. Staff 24: G4, A4, B4, C5, D#5. Staff 25: G4, A4, B4, C5, D#5. Staff 26: G4, A4, B4, C5, D#5. Staff 27: G4, Ab4, B4, C5, D#5. Staff 28: G4, A4, B4, C5, D4. Staff 29: G4, A4, B4, C5, D#5. Staff 30: G4, A4, B4, C5, D4.

Melodies: 31 - 40

This image displays ten musical staves, each containing a five-measure melodic exercise. The exercises are numbered 31 through 40. Each staff begins with a treble clef and a key signature of one flat (B-flat). The notes are as follows:

- Staff 31: B-flat, C, D, E, F-sharp.
- Staff 32: G, A, B, C, D.
- Staff 33: E, F, G, A, B.
- Staff 34: C, D, E, F, G.
- Staff 35: A, B, C, D, E.
- Staff 36: F, G, A, B, C.
- Staff 37: D, E, F, G, A.
- Staff 38: B, C, D, E, F.
- Staff 39: G, A, B, C, D.
- Staff 40: E, F, G, A, B.

Melodies: 41 - 50

The image displays ten musical staves, each containing a single melodic line. The notes are primarily quarter notes, with some half notes. The accidentals used include natural signs, flats (b), and sharps (#). The staves are arranged vertically, and each staff concludes with a double bar line. The notes are positioned on various lines and spaces of the five-line staff, representing different pitches. The overall layout is clean and focused on the melodic content.

Melodies: 51 - 60

The image displays ten musical staves, each containing a single melodic line. The notation is as follows:

- Staff 1:** Treble clef, notes G4, A4, B4, C5, ending with a whole note G#4.
- Staff 2:** Treble clef, notes G4, A4, B4, C5, ending with a whole note G#4.
- Staff 3:** Treble clef, notes F#4, G4, A4, B4, ending with a whole note G4.
- Staff 4:** Treble clef, notes G4, A4, B4, C5, ending with a whole note G4.
- Staff 5:** Treble clef, notes G4, A4, B4, C5, ending with a whole note G4.
- Staff 6:** Treble clef, notes G4, A4, B4, C5, ending with a whole note Bb4.
- Staff 7:** Treble clef, notes G4, A4, B4, C5, ending with a whole note G#4.
- Staff 8:** Treble clef, notes G4, A4, B4, C5, ending with a whole note G#4.
- Staff 9:** Treble clef, notes G4, A4, B4, C5, ending with a whole note G#4.
- Staff 10:** Treble clef, notes G4, A4, B4, C5, ending with a whole note G#4.

Melodies: 61 - 70

The image displays ten musical staves, each containing a sequence of notes and accidentals. The notes are primarily quarter notes, with some half notes and a few accidentals (sharps and flats) indicating specific pitches. The staves are arranged vertically, and each staff ends with a double bar line. The notes and accidentals are as follows:

- Staff 1: G4, A4, B4, C5, D5 (sharp)
- Staff 2: F4, G4, A4, B4, C5
- Staff 3: G4, A4, B4, C5, D5
- Staff 4: G4, A4, B4, C5, D5 (sharp)
- Staff 5: G4, A4, B4, C5, D5 (sharp)
- Staff 6: G4, A4, B4, C5, D5 (sharp)
- Staff 7: G4, A4, B4, C5, D5 (sharp)
- Staff 8: G4, A4, B4, C5, D5 (flat)
- Staff 9: G4, A4, B4, C5, D5 (flat)
- Staff 10: G4, A4, B4, C5, D5 (flat)

Melodies: 71 - 80

The image displays ten musical staves, each containing a sequence of notes. The notes are primarily quarter notes, with some staves featuring a sharp sign (#) before the final note. The staves are arranged vertically, and each staff begins with a treble clef. The notes are placed on various lines and spaces of the five-line staff, illustrating different melodic patterns and intervals.



Melodies: 81 - 90

The image displays ten musical staves, each containing a single melodic line. The notation is as follows:

- Staff 1:** Treble clef, notes G4, A4, B4, C5, D5.
- Staff 2:** Treble clef, notes G4, A4, B4, C5, D5 with a sharp sign (#).
- Staff 3:** Treble clef, notes G4, A4 with a sharp sign (#), B4, C5, D5 with a sharp sign (#).
- Staff 4:** Treble clef, notes G4, A4, B4, C5, D5 with a sharp sign (#).
- Staff 5:** Treble clef, notes G4, A4, B4, C5, D5 with a sharp sign (#).
- Staff 6:** Treble clef, notes G4 with a sharp sign (#), A4, B4, C5, D5 with a sharp sign (#).
- Staff 7:** Treble clef, notes G4, A4, B4, C5, D5 with a sharp sign (#).
- Staff 8:** Treble clef, notes G4, A4, B4, C5, D5 with a sharp sign (#).
- Staff 9:** Treble clef, notes G4, A4, B4, C5, D5 with a sharp sign (#).
- Staff 10:** Treble clef, notes G4, A4 with a sharp sign (#), B4, C5, D5 with a sharp sign (#).

Melodies: 91 - 100

The image displays ten musical staves, each containing a sequence of notes and accidentals. The notes are primarily quarter notes, with some half notes and rests. The accidentals include natural signs, flats (b), and sharps (#). The staves are arranged vertically, and each staff concludes with a double bar line. The first staff shows a sequence of four quarter notes: G4, A4, B4, and C5. The second staff shows a sequence of four quarter notes: G4, F4 (with a flat), E4, and D4 (with a flat). The third staff shows a sequence of four quarter notes: G4, A4, B4, and C5, followed by a sharp sign (#) above the staff. The fourth staff shows a sequence of four quarter notes: G4, A4, B4, and C5, followed by a sharp sign (#) above the staff. The fifth staff shows a sequence of four quarter notes: G4, A4, B4, and C5, followed by a sharp sign (#) above the staff. The sixth staff shows a sequence of four quarter notes: G4, A4, B4, and C5, followed by a sharp sign (#) above the staff. The seventh staff shows a sequence of four quarter notes: G4, A4 (with a sharp), B4, and C5, followed by a sharp sign (#) above the staff. The eighth staff shows a sequence of four quarter notes: G4, A4, B4, and C5, followed by a sharp sign (#) above the staff. The ninth staff shows a sequence of four quarter notes: G4, A4, B4, and C5, followed by a sharp sign (#) above the staff. The tenth staff shows a sequence of four quarter notes: G4, A4 (with a sharp), B4, and C5, followed by a sharp sign (#) above the staff.
