# Supplementary material for: Musical training shapes neural responses to melodic and prosodic expectation
Source: PubMed Central journal article supplement (PMC5069926; doi:10.1016/j.brainres.2016.09.015), 2016-11-01
Supplement: mmc4.pdf [file mmc4.pdf]

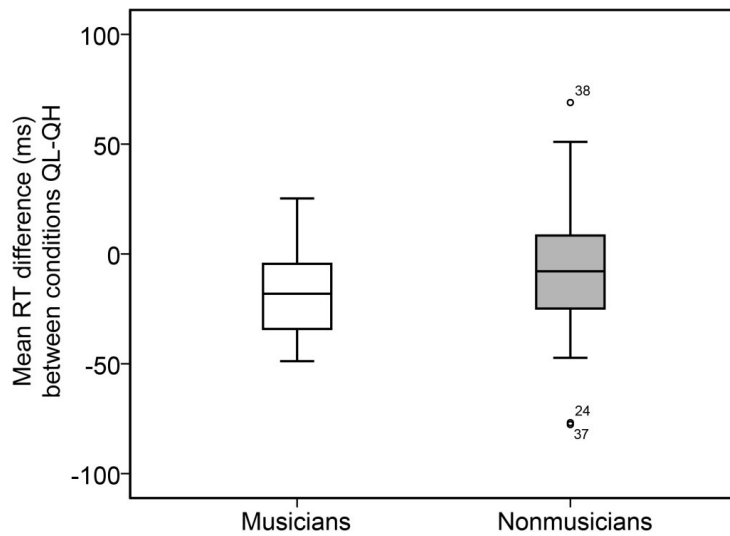

**Figure – Boxplots with mean RT difference (ms) between conditions QL-QH, for musicians (white) and nonmusicians (gray).**

Table

*Dispersion measures (range, interquartile range, standard deviation, variance, minimum, and maximum) for mean RT differences (ms) between conditions QL-QH, for musicians and nonmusicians*

|                     | Musicians | Nonmusicians |
|---------------------|-----------|--------------|
| Range               | 74.11     | 146.62       |
| Interquartile range | 32.91     | 42.81        |
| Standard deviation  | 20.56     | 39.78        |
| Variance            | 422.75    | 1582.182     |
| Min                 | -48.83    | -77.67       |
| Max                 | 25.28     | 68.95        |
